# Supplementary material for: Non-aqueous selective synthesis of orthosilicic acid and its oligomers
Source: PubMed Central journal article supplement (PMC5529440; doi:10.1038/s41467-017-00168-5), 2017-07-26
Supplement: 41467_2017_168_MOESM2_ESM.pdf [file 41467_2017_168_MOESM2_ESM.pdf]

*Editorial Note:*

*This manuscript has been previously reviewed at another journal that is not operating a transparent peer review scheme. This document only contains reviewer comments and rebuttal letters for versions considered at Nature Communications.*
